# Supplementary material for: How to optimally allocate sampling effort in experimental ecology
Source: Sci Rep. 2026 Feb 13;16:6503. doi: 10.1038/s41598-026-38541-4 (PMC12910100; doi:10.1038/s41598-026-38541-4)
Supplement: Supplementary file 1 — Supplementary Material 1 [file 41598_2026_38541_MOESM1_ESM.xlsx]

## Sheet: TabS1_Chalcraft_20%
	For Chalcraft's prediction accuracy and 20% noise
	Depicted are the direction of single and interactive effects (first two are the individual effects of predictor A and B and third one ist the interactive effect) as well as marginal and conditional R2 values for the respective models (in parentheses)
		Effect:
		Model 1	Model 2	Model 3	Model 4
Sampling strategy	Response shape	~Replicates	~Replicates*Predictor extremes (excluded/included)	~Replicates*Pattern (kown/unknown)	~Replicates*Total sample size
systematic	Linear	+*(0.000221,0.225)	+*,n.s.,n.s.(0.000221,0.225)	-*, -*, +*(0.0108,0.22)	+*, +*, -*(0.101,0.119)
	Exponential1	n.s.(1.01e-05,6.62e-05)	n.s.,n.s.,n.s.(1.01e-05,6.62e-05)	n.s.,n.s.,n.s.(3.6e-05,7.21e-05)	n.s.,n.s.,n.s.(1.49e-05,3.49e-05)
	Exponential2	-*(0.0102,0.34)	-*,n.s.,n.s.(0.0102,0.34)	-*, +*, +*(0.0696,0.306)	+*, +*, -*(0.101,0.22)
	Hump centered	+*(0.000314,0.283)	+*,n.s.,n.s.(0.000314,0.283)	-*, -*, +*(0.00642,0.28)	+*, +*, -*(0.139,0.149)
	Hump non-centered	-*(0.00237,0.27)	-*,n.s.,n.s.(0.00236,0.271)	-*, +*, +*(0.0303,0.261)	+*, +*, -*(0.0973,0.144)
	Logistic	n.s.(3.61e-05,0.000157)	n.s.,n.s.,n.s.(3.61e-05,0.000157)	-*,n.s.,n.s.(8.86e-05,0.000166)	n.s.,n.s.,n.s.(4.09e-05,8.55e-05)
log systematic	Linear	-*(0.0046,0.274)	-*,n.s.,n.s.(0.0046,0.273)	-*, -*, +*(0.0732,0.225)	+*, +*, -*(0.0502,0.186)
	Exponential1	-*(0.0514,0.599)	-*,n.s.,n.s.(0.0514,0.599)	-*, -*, -*(0.346,0.516)	-*, +*, +*(0.0733,0.532)
	Exponential2	-*(0.0805,0.426)	-*,n.s.,n.s.(0.0805,0.426)	-*, -*, -*(0.156,0.394)	-*, +*, +*(0.128,0.274)
	Hump centered	-*(4.41e-05,0.000116)	n.s.,n.s.,n.s.(4.41e-05,0.000116)	n.s.,n.s.,n.s.(9.91e-05,0.000138)	-*,n.s., +*(0.000242,0.000275)
	Hump non-centered	-*(0.023,0.263)	-*,n.s.,n.s.(0.023,0.263)	-*, -*, +*(0.0564,0.24)	-*, +*, -*(0.0695,0.14)
	Logistic	-*(0.000302,0.00132)	-*,n.s.,n.s.(0.000302,0.00132)	-*,n.s., -*(0.000365,0.00138)	n.s., +*,n.s.(0.00045,0.000462)
preferential extremes	Linear	n.s.(1.94e-05,0.000242)	n.s.,n.s.,n.s.(9.65e-05,0.000191)	n.s.,n.s.,n.s.(1.95e-05,0.000242)	-*,n.s., +*(0.000129,0.000257)
	Exponential1	n.s.(3.35e-06,4.13e-06)	n.s.,n.s.,n.s.(1.56e-05,1.59e-05)	n.s.,n.s.,n.s.(1.59e-05,1.67e-05)	n.s.,n.s.,n.s.(7.23e-06,7.73e-06)
	Exponential2	n.s.(9.45e-07,7.58e-06)	n.s.,n.s.,n.s.(1.09e-05,1.74e-05)	n.s.,n.s.,n.s.(1.09e-05,1.74e-05)	n.s.,n.s.,n.s.(7.68e-06,8.04e-06)
	Hump centered	-*(0.000175,0.000391)	n.s.,n.s., -*(0.000339,0.000525)	n.s.,n.s., -*(0.000397,0.000457)	-*,n.s.,n.s.(0.000199,0.000384)
	Hump non-centered	-*(0.000106,0.000121)	-*,n.s., +*(0.000228,0.000228)	-*,n.s., +*(0.000216,0.00023)	n.s.,n.s.,n.s.(0.000125,0.00014)
	Logistic	n.s.(1.24e-07,0.000112)	n.s.,n.s.,n.s.(2.12e-05,0.000108)	n.s.,n.s.,n.s.(2.13e-05,0.000108)	n.s.,n.s.,n.s.(9.28e-06,5.87e-05)
preferential slope	Linear	n.s.(4.63e-08,0.000922)	n.s., +*,n.s.(4.47e-05,0.000913)	n.s.,n.s.,n.s.(4.75e-08,0.000922)	n.s., +*,n.s.(4.88e-05,0.000102)
	Exponential1	n.s.(8.24e-08,2.52e-05)	n.s.,n.s.,n.s.(9.26e-06,3.44e-05)	n.s.,n.s.,n.s.(9.26e-06,3.44e-05)	n.s.,n.s.,n.s.(8.74e-06,8.75e-06)
	Exponential2	n.s.(1.92e-07,1.14e-05)	n.s.,n.s.,n.s.(1.36e-05,1.57e-05)	n.s.,n.s.,n.s.(1.07e-05,2.19e-05)	n.s.,n.s.,n.s.(9.67e-06,1.87e-05)
	Hump centered	-*(4.82e-05,0.000362)	-*,n.s.,n.s.(0.000138,0.000335)	n.s.,n.s.,n.s.(0.000137,0.000336)	n.s.,n.s.,n.s.(7.13e-05,0.000304)
	Hump non-centered	n.s.(7.15e-06,0.000135)	n.s.,n.s.,n.s.(5.98e-05,0.000103)	n.s.,n.s.,n.s.(7.45e-06,0.000135)	-*,n.s., +*(9.71e-05,0.000182)
	Logistic	n.s.(2.94e-07,8.67e-06)	n.s.,n.s.,n.s.(9.39e-06,1.77e-05)	n.s.,n.s.,n.s.(9.58e-06,1.78e-05)	n.s.,n.s.,n.s.(1.11e-05,1.13e-05)
preferential slope +extremes	Linear	n.s.(8.61e-06,0.000238)	n.s., +*,n.s.(7.68e-05,0.000187)	n.s.,n.s.,n.s.(1.52e-05,0.000244)	n.s., +*,n.s.(4.99e-05,0.000169)
	Exponential1	n.s.(3.88e-06,9.47e-05)	n.s.,n.s.,n.s.(4.28e-05,8.07e-05)	n.s.,n.s.,n.s.(3.68e-05,8.97e-05)	n.s.,n.s.,n.s.(1.63e-05,0.000107)
	Exponential2	n.s.(2e-05,9.81e-05)	-*,n.s.,n.s.(6.75e-05,9.97e-05)	n.s.,n.s.,n.s.(5.1e-05,0.000108)	-*,n.s., +*(0.000141,0.000208)
	Hump centered	n.s.(1.06e-09,2.03e-05)	n.s.,n.s.,n.s.(1.16e-05,2.61e-05)	n.s.,n.s.,n.s.(1.16e-05,2.61e-05)	n.s.,n.s.,n.s.(1.42e-05,2.58e-05)
	Hump non-centered	-*(0.000103,0.000322)	-*,n.s., +*(0.000254,0.000312)	-*,n.s.,n.s.(0.000104,0.000323)	n.s., +*,n.s.(0.000107,0.000268)
	Logistic	n.s.(3.43e-08,0.00038)	n.s.,n.s.,n.s.(3.51e-07,0.00038)	n.s.,n.s.,n.s.(2.26e-05,0.000384)	n.s.,n.s.,n.s.(2.46e-05,4.28e-05)
random	Linear	n.s.(4.48e-06,0.000543)	n.s.,n.s.,n.s.(4.48e-06,0.000543)	n.s., +*,n.s.(3.87e-05,0.000544)	n.s., +*,n.s.(0.000125,0.000159)
	Exponential1	n.s.(1.59e-05,0.000133)	n.s.,n.s.,n.s.(1.59e-05,0.000133)	n.s.,n.s.,n.s.(5.24e-05,0.000114)	n.s., -*,n.s.(5.5e-05,0.00011)
	Exponential2	n.s.(3.07e-08,0.000375)	n.s.,n.s.,n.s.(3.07e-08,0.000375)	n.s.,n.s.,n.s.(2.2e-05,0.00038)	n.s.,n.s.,n.s.(2.39e-05,4.12e-05)
	Hump centered	n.s.(1.72e-05,0.000508)	n.s.,n.s.,n.s.(1.72e-05,0.000508)	n.s., -*,n.s.(0.000115,0.000428)	n.s.,n.s.,n.s.(7.65e-05,0.000254)
	Hump non-centered	-*(7.42e-05,0.000512)	n.s.,n.s.,n.s.(7.42e-05,0.000512)	n.s.,n.s.,n.s.(8.65e-05,0.00052)	n.s., +*,n.s.(8.35e-05,8.78e-05)
	Logistic	n.s.(4.04e-08,0.000374)	n.s.,n.s.,n.s.(4.04e-08,0.000374)	n.s.,n.s.,n.s.(2.2e-05,0.000379)	n.s.,n.s.,n.s.(1.95e-05,3.68e-05)

## Sheet: TabS2_Chalcraft_100%
	For Chalcraft's prediction accuracy and∙100% noise
	Depicted are the direction of single and interactive effects (first two are the individual effects of predictor A and B and third one ist the interactive effect) as well as marginal and conditional R2 values for the respective models (in parentheses)
		Effect:
		Model 1	Model 2	Model 3	Model 4
Sampling strategy	Response shape	~Replicates	~Replicates*Predictor extremes (excluded/included)	~Replicates*Pattern (kown/unknown)	~Replicates*Total sample size
systematic	Linear	n.s.(6.07e-06,0.000811)	n.s.,n.s.,n.s.(6.07e-06,0.000811)	n.s.,n.s.,n.s.(1.13e-05,0.000816)	+*, +*, -*(0.000269,0.000269)
	Exponential1	n.s.(5.42e-06,0.000302)	n.s.,n.s.,n.s.(5.42e-06,0.000302)	n.s., +*,n.s.(9.39e-05,0.000266)	n.s., +*,n.s.(5.53e-05,0.000179)
	Exponential2	n.s.(2.24e-05,7.77e-05)	n.s.,n.s.,n.s.(2.24e-05,7.75e-05)	n.s.,n.s.,n.s.(4.39e-05,7.95e-05)	n.s., -*,n.s.(6.14e-05,8.09e-05)
	Hump centered	n.s.(6.76e-06,6.19e-05)	n.s.,n.s.,n.s.(6.76e-06,6.19e-05)	n.s.,n.s.,n.s.(3.17e-05,6.49e-05)	n.s.,n.s.,n.s.(9.15e-06,3.12e-05)
	Hump non-centered	n.s.(3.3e-06,0.000204)	n.s.,n.s.,n.s.(3.3e-06,0.000204)	n.s.,n.s.,n.s.(6.43e-06,0.000207)	n.s.,n.s.,n.s.(4.82e-05,4.82e-05)
	Logistic	n.s.(2.56e-06,0.000159)	n.s.,n.s.,n.s.(2.56e-06,0.000159)	n.s.,n.s.,n.s.(4.46e-05,0.000135)	n.s.,n.s.,n.s.(3.66e-05,0.000104)
log systematic	Linear	n.s.(4.56e-07,9.24e-05)	n.s.,n.s.,n.s.(4.56e-07,9.24e-05)	n.s.,n.s.,n.s.(2.07e-05,9.47e-05)	n.s.,n.s.,n.s.(6.81e-06,2.46e-05)
	Exponential1	n.s.(1.4e-06,9.13e-05)	n.s.,n.s.,n.s.(1.4e-06,9.13e-05)	n.s.,n.s.,n.s.(2.33e-05,9.61e-05)	n.s.,n.s.,n.s.(1.72e-05,3.42e-05)
	Exponential2	n.s.(1.21e-07,0.000381)	n.s.,n.s.,n.s.(1.2e-07,0.00038)	n.s.,n.s.,n.s.(2.42e-05,0.000383)	n.s.,n.s.,n.s.(2.46e-05,4.5e-05)
	Hump centered	n.s.(2.73e-05,0.000109)	n.s.,n.s.,n.s.(2.73e-05,0.000109)	n.s.,n.s.,n.s.(8.27e-05,0.00011)	-*,n.s., +*(0.000139,0.000193)
	Hump non-centered	n.s.(6.33e-06,0.000222)	n.s.,n.s.,n.s.(6.41e-06,0.000206)	n.s.,n.s.,n.s.(6.41e-06,0.000206)	n.s.,n.s.,n.s.(3.37e-05,3.37e-05)
	Logistic	n.s.(8.4e-08,9.98e-05)	n.s.,n.s.,n.s.(8.4e-08,9.97e-05)	n.s.,n.s.,n.s.(1.97e-05,1e-04)	n.s.,n.s.,n.s.(2.25e-05,4.16e-05)
preferential extremes	Linear	n.s.(1.29e-06,1.32e-05)	n.s.,n.s.,n.s.(2.75e-05,3.38e-05)	n.s.,n.s.,n.s.(1.73e-05,2.29e-05)	n.s.,n.s.,n.s.(7.2e-06,1.91e-05)
	Exponential1	n.s.(1.62e-06,2.33e-06)	n.s.,n.s.,n.s.(1.2e-05,1.2e-05)	n.s.,n.s.,n.s.(1.09e-05,1.16e-05)	n.s.,n.s.,n.s.(2.87e-06,3.57e-06)
	Exponential2	n.s.(6.23e-06,2.13e-05)	n.s.,n.s.,n.s.(2.25e-05,3.01e-05)	n.s.,n.s.,n.s.(2.4e-05,3.15e-05)	n.s.,n.s.,n.s.(8.12e-06,2.32e-05)
	Hump centered	n.s.(3.12e-05,9.74e-05)	n.s.,n.s.,n.s.(6.62e-05,0.000132)	n.s.,n.s.,n.s.(0.000104,0.000104)	-*,n.s., +*(8.66e-05,0.000152)
	Hump non-centered	n.s.(2.54e-05,0.000255)	n.s., -*,n.s.(0.000116,0.00023)	n.s.,n.s.,n.s.(3.08e-05,0.00026)	n.s.,n.s.,n.s.(3.94e-05,0.000155)
	Logistic	n.s.(1.69e-05,0.000131)	n.s.,n.s.,n.s.(5.18e-05,0.000136)	n.s.,n.s.,n.s.(5.28e-05,0.000134)	n.s.,n.s.,n.s.(3.21e-05,9.74e-05)
preferential slope	Linear	n.s.(5.97e-06,0.000101)	n.s.,n.s.,n.s.(4.04e-05,9.58e-05)	n.s.,n.s.,n.s.(5.97e-06,0.000101)	n.s.,n.s.,n.s.(6.9e-06,4.64e-05)
	Exponential1	n.s.(1.63e-06,3.53e-05)	n.s.,n.s.,n.s.(9.06e-06,4.27e-05)	n.s.,n.s.,n.s.(1.63e-05,4.42e-05)	n.s.,n.s.,n.s.(1.17e-05,1.75e-05)
	Exponential2	n.s.(1.21e-07,1.22e-05)	n.s.,n.s.,n.s.(8.77e-06,2.08e-05)	n.s.,n.s.,n.s.(8.68e-06,2.08e-05)	n.s.,n.s.,n.s.(1.91e-05,1.91e-05)
	Hump centered	n.s.(1.07e-05,0.00011)	n.s.,n.s.,n.s.(4.36e-05,0.000108)	n.s.,n.s.,n.s.(6.2e-05,9.67e-05)	n.s.,n.s.,n.s.(2.56e-05,0.000124)
	Hump non-centered	n.s.(3.04e-05,4.9e-05)	n.s.,n.s.,n.s.(4.56e-05,6.23e-05)	n.s.,n.s.,n.s.(3.59e-05,5.44e-05)	n.s.,n.s.,n.s.(5.69e-05,5.88e-05)
	Logistic	n.s.(1.54e-05,4.21e-05)	n.s.,n.s.,-1*(6.43e-05,9.11e-05)	n.s.,n.s.,n.s.(5.32e-05,5.32e-05)	n.s.,n.s.,n.s.(3.86e-05,6.54e-05)
preferential slope +extremes	Linear	n.s.(4.27e-06,7.13e-05)	n.s.,n.s.,n.s.(1.92e-05,8.27e-05)	n.s.,n.s.,n.s.(5.64e-06,7.27e-05)	n.s.,n.s.,n.s.(2.39e-05,2.74e-05)
	Exponential1	n.s.(2.19e-06,6.91e-06)	n.s.,n.s.,n.s.(1.29e-05,1.77e-05)	n.s.,n.s.,n.s.(1.33e-05,1.79e-05)	n.s.,n.s.,n.s.(8.9e-06,9.03e-06)
	Exponential2	n.s.(3.55e-06,7.81e-06)	n.s.,n.s.,n.s.(1.57e-05,1.99e-05)	n.s.,n.s.,n.s.(1.62e-05,2e-05)	n.s.,n.s.,n.s.(8.57e-06,9.01e-06)
	Hump centered	n.s.(3.63e-07,0.000118)	n.s.,n.s.,n.s.(8.77e-06,0.000126)	n.s.,n.s.,n.s.(5.46e-05,8.06e-05)	n.s.,n.s.,n.s.(9.14e-06,1e-04)
	Hump non-centered	-*(4.29e-05,0.000101)	-*,n.s.,n.s.(9.21e-05,0.000131)	n.s.,n.s.,n.s.(4.29e-05,0.000101)	-*,n.s., +*(0.000232,0.00025)
	Logistic	n.s.(1.54e-05,0.00014)	n.s.,n.s., -*(5.24e-05,0.000177)	n.s.,n.s.,n.s.(4.44e-05,0.000145)	n.s.,n.s.,n.s.(3.11e-05,5.47e-05)
random	Linear	n.s.(1.75e-05,0.000123)	n.s.,n.s.,n.s.(1.75e-05,0.000123)	n.s.,n.s.,n.s.(1.75e-05,0.000123)	n.s.,n.s.,n.s.(1.79e-05,1.79e-05)
	Exponential1	n.s.(2.85e-07,0.000338)	n.s.,n.s.,n.s.(2.86e-07,0.000338)	n.s.,n.s.,n.s.(2.61e-05,0.000333)	n.s.,n.s.,n.s.(8.58e-06,3.95e-05)
	Exponential2	n.s.(4.17e-06,0.000111)	n.s.,n.s.,n.s.(4.19e-06,0.000113)	n.s.,n.s.,n.s.(2.8e-05,0.000134)	n.s.,n.s.,n.s.(5.07e-05,5.33e-05)
	Hump centered	n.s.(7.81e-07,0.000159)	n.s.,n.s.,n.s.(7.76e-07,0.000159)	n.s.,n.s.,n.s.(2.34e-05,0.000163)	n.s.,n.s.,n.s.(1.4e-05,3.24e-05)
	Hump non-centered	n.s.(2.81e-08,0.000421)	n.s.,n.s.,n.s.(2.81e-08,0.000421)	n.s.,n.s.,n.s.(1.73e-07,0.000421)	n.s., +*,n.s.(0.000103,0.000103)
	Logistic	n.s.(4.86e-08,9.82e-05)	n.s.,n.s.,n.s.(4.86e-08,9.84e-05)	n.s.,n.s.,n.s.(2.11e-05,9.77e-05)	n.s.,n.s.,n.s.(2.33e-05,4.51e-05)

## Sheet: TabS3_R2_20%
	For multiple R2 and 20% random variation
	Depicted are the direction of single and interactive effects (first two are the individual effects of predictor A and B and third one ist the interactive effect) as well as marginal and conditional R2 values for the respective models (in parentheses)
		Effect:
		Model 1	Model 2	Model 3	Model 4
Sampling strategy	Response shape	~Replicates	~Replicates*Predictor extremes (excluded/included)	~Replicates*Pattern (kown/unknown)	~Replicates*Total sample size
systematic	Linear	+*(0.00101,0.21)	+*,n.s., n.s.(0.00101,0.21)	-*, -*, +*(0.086,0.172)	+*, +*, -*(0.0463,0.178)
	Exponential1	-*(0.0174,0.929)	-*, n.s., n.s.(0.0172,0.93)	-*, -*, -*(0.832,0.879)	-*, +*, +*(0.0185,0.926)
	Exponential2	-*(0.00572,0.53)	-*, n.s., n.s.(0.00572,0.53)	-*, +*, +*(0.268,0.418)	+*, +*, -*(0.0646,0.49)
	Hump centered	+*(0.00168,0.244)	+*, n.s.,n.s.(0.00168,0.244)	-*, -*, +*(0.0358,0.229)	+*, +*, -*(0.126,0.183)
	Hump non-centered	+*(0.00188,0.313)	+*,n.s., n.s.(0.00188,0.313)	-*, +*, +*(0.151,0.26)	+*, +*, -*(0.0732,0.291)
	Logistic	-*(0.163,0.364)	-*, n.s.,n.s.(0.163,0.364)	-*, -*, +*(0.217,0.409)	-*, +*, +*(0.17,0.185)
log systematic	Linear	-*(0.00361,0.262)	-*, n.s.,n.s.(0.00361,0.262)	-*, -*, +*(0.0994,0.197)	+*, +*, -*(0.0331,0.21)
	Exponential1	-*(0.0168,0.949)	-*, n.s.,n.s.(0.0169,0.949)	-*, -*, -*(0.865,0.911)	-*, +*, +*(0.0184,0.947)
	Exponential2	-*(0.0467,0.379)	-*, n.s.,n.s.(0.0467,0.379)	-*, -*, -*(0.141,0.324)	-*, +*, -*(0.0907,0.274)
	Hump centered	-*(0.00882,0.357)	-*, n.s.,n.s.(0.00881,0.358)	-*, -*, +*(0.115,0.292)	-*, +*, -*(0.0559,0.261)
	Hump non-centered	-*(0.0123,0.216)	-*,n.s., n.s.(0.0123,0.216)	-*, -*, +*(0.0597,0.181)	n.s., +*, -*(0.0471,0.141)
	Logistic	-*(0.195,0.521)	-*, n.s.,n.s.(0.195,0.521)	-*, -*, -*(0.254,0.498)	-*, +*, +*(0.231,0.352)
preferential extremes	Linear	-*(0.000812,0.219)	-*, +*, -*(0.00629,0.215)	-*, -*, +*(0.071,0.174)	+*, +*, -*(0.0322,0.17)
	Exponential1	-*(0.00824,0.929)	-*, +*, -*(0.0184,0.928)	-*, -*, -*(0.822,0.874)	-*, +*, +*(0.00802,0.928)
	Exponential2	-*(0.044,0.237)	-*, +*, +*(0.0723,0.221)	-*, -*, -*(0.0593,0.228)	-*, +*, n.s.(0.0754,0.156)
	Hump centered	-*(0.0331,0.372)	-*, +*, +*(0.111,0.33)	-*, -*, n.s.(0.0669,0.352)	-*, +*, +*(0.0716,0.288)
	Hump non-centered	-*(0.00304,0.129)	-*, +*, n.s.(0.0107,0.122)	-*, -*, +*(0.0155,0.127)	+*, +*, -*(0.0422,0.0743)
	Logistic	-*(0.134,0.337)	-*, +*, -*(0.136,0.337)	-*, -*, +*(0.137,0.34)	-*, +*, +*(0.163,0.166)
preferential slope	Linear	n.s.(5.87e-06,0.211)	-*, +*, +*(0.000793,0.211)	-*, -*, +*(0.0912,0.152)	+*, +*, -*(0.0269,0.187)
	Exponential1	+*(4.74e-06,0.981)	+*, +*,n.s.(0.00593,0.981)	-*, -*, +*(0.941,0.964)	+*, +*, -*(0.000199,0.981)
	Exponential2	+*(0.00265,0.639)	+*, +*, +*(0.104,0.603)	n.s., -*, +*(0.299,0.537)	+*, +*, -*(0.00467,0.64)
	Hump centered	-*(0.0116,0.229)	-*, -*, +*(0.0272,0.241)	-*, -*, +*(0.0708,0.188)	-*, +*, -*(0.0456,0.162)
	Hump non-centered	-*(4.9e-05,0.185)	-*, +*, +*(0.00873,0.179)	-*, -*, +*(0.0726,0.139)	+*, +*, -*(0.0295,0.171)
	Logistic	+*(0.0048,0.666)	+*, +*, -*(0.0373,0.656)	n.s., -*, +*(0.439,0.532)	+*, -*, -*(0.0045,0.665)
preferential slope +extremes	Linear	n.s.(6.11e-06,0.206)	-*, +*, +*(0.000584,0.206)	-*, -*, +*(0.0864,0.151)	+*, +*, -*(0.0274,0.178)
	Exponential1	-*(0.00342,0.954)	-*, -*, +*(0.00407,0.954)	-*, -*, -*(0.903,0.913)	-*, +*, n.s.(0.00412,0.953)
	Exponential2	-*(0.0157,0.221)	-*, -*, +*(0.025,0.23)	-*, -*, +*(0.0779,0.174)	n.s., +*, -*(0.0487,0.17)
	Hump centered	-*(0.0135,0.243)	-*, -*, +*(0.0324,0.25)	-*, -*, +*(0.0694,0.205)	-*, +*, -*(0.0523,0.173)
	Hump non-centered	-*(0.000305,0.133)	-*, n.s., +*(0.00165,0.133)	-*, -*, +*(0.0425,0.11)	+*, +*, -*(0.0357,0.105)
	Logistic	+*(0.00342,0.671)	+*, +*, -*(0.035,0.661)	-*, -*, +*(0.446,0.537)	+*, -*, -*(0.00352,0.67)
random	Linear	-*(0.00209,0.243)	-*,n.s., n.s.(0.00209,0.243)	-*, -*, +*(0.091,0.183)	+*, +*, -*(0.033,0.196)
	Exponential1	-*(0.00756,0.948)	-*, n.s.,n.s.(0.00756,0.948)	-*, -*, -*(0.89,0.904)	-*, +*, +*(0.00738,0.947)
	Exponential2	-*(0.0661,0.328)	-*, n.s.,n.s.(0.0661,0.328)	-*, -*, -*(0.139,0.29)	-*, +*, +*(0.0966,0.231)
	Hump centered	-*(0.0653,0.346)	-*, n.s., n.s.(0.0653,0.346)	-*, -*, n.s.(0.0995,0.325)	-*, +*, +*(0.122,0.195)
	Hump non-centered	-*(0.00706,0.177)	-*,n.s., n.s.(0.00706,0.177)	-*, -*, +*(0.0449,0.151)	+*, +*, -*(0.0458,0.117)
	Logistic	-*(0.109,0.382)	-*, n.s.,n.s.(0.109,0.382)	-*, -*, n.s.(0.161,0.354)	-*, +*, +*(0.136,0.242)

## Sheet: TabS4_R2_100%
	For multiple R2 and∙100% random variation
	Depicted are the direction of single and interactive effects (first two are the individual effects of predictor A and B and third one ist the interactive effect) as well as marginal and conditional R2 values for the respective models (in parentheses)
		Effect:
		Model 1	Model 2	Model 3	Model 4
Sampling strategy	Response shape	~Replicates	~Replicates*Predictor extremes (excluded/included)	~Replicates*Pattern (kown/unknown)	~Replicates*Total sample size
systematic	Linear	+*(0.00297,0.283)	+*, n.s.,n.s.(0.00297,0.283)	-*, -*, +*(0.162,0.197)	+*, +*, -*(0.0307,0.28)
	Exponential1	+*(0.000583,0.974)	+*, n.s.,n.s.(0.000582,0.974)	-*, -*, +*(0.952,0.952)	+*, +*, -*(0.00165,0.974)
	Exponential2	+*(0.00941,0.535)	+*, n.s.,n.s.(0.00949,0.53)	-*, -*, +*(0.384,0.407)	+*, +*, -*(0.0377,0.536)
	Hump centered	+*(0.0115,0.257)	+*, n.s., n.s.(0.0115,0.257)	+*, -*, +*(0.0776,0.222)	+*, +*, -*(0.185,0.289)
	Hump non-centered	+*(0.00373,0.258)	+*,n.s., n.s.(0.00373,0.258)	-*, -*, +*(0.148,0.185)	+*, +*, -*(0.0344,0.256)
	Logistic	-*(0.0305,0.221)	-*, n.s.,n.s.(0.0305,0.221)	-*, -*, +*(0.0526,0.233)	-*, +*,n.s.(0.13,0.142)
log systematic	Linear	-*(8.79e-05,0.283)	-*, n.s.,n.s.(8.79e-05,0.283)	-*, -*, +*(0.153,0.178)	+*, +*, -*(0.0105,0.273)
	Exponential1	-*(0.000301,0.987)	-*, n.s.,n.s.(3e-04,0.987)	-*, -*,n.s.(0.972,0.975)	n.s., +*, -*(0.000702,0.987)
	Exponential2	-*(0.00204,0.643)	-*, n.s.,n.s.(0.00204,0.643)	-*, -*, +*(0.442,0.488)	+*, +*, -*(0.0151,0.633)
	Hump centered	-*(0.00454,0.385)	-*, n.s.,n.s.(0.00453,0.387)	+*, -*, -*(0.202,0.277)	+*, +*, -*(0.0526,0.377)
	Hump non-centered	-*(0.00155,0.312)	-*,n.s., n.s.(0.00161,0.285)	-*, -*, +*(0.144,0.186)	+*, +*, -*(0.016,0.267)
	Logistic	-*(0.00212,0.108)	-*,n.s., n.s.(0.00212,0.108)	+*, +*, -*(0.0216,0.104)	+*, +*, -*(0.0721,0.0977)
preferential extremes	Linear	+*(0.000776,0.297)	+*, +*, n.s.(0.00174,0.296)	-*, -*, +*(0.162,0.201)	+*, +*, -*(0.024,0.29)
	Exponential1	n.s.(3.66e-07,0.978)	-*, -*, +*(0.00027,0.978)	-*, -*, +*(0.957,0.957)	n.s., +*,n.s.(0.000122,0.978)
	Exponential2	+*(0.000327,0.546)	-*, -*, +*(0.00383,0.548)	-*, -*, +*(0.371,0.386)	+*, +*, -*(0.012,0.546)
	Hump centered	-*(0.0149,0.383)	-*, +*, +*(0.0662,0.371)	-*, -*,n.s.(0.106,0.327)	n.s., +*, -*(0.105,0.354)
	Hump non-centered	+*(0.00096,0.261)	+*, +*,n.s.(0.00123,0.261)	-*, -*, +*(0.142,0.175)	+*, +*, -*(0.0237,0.256)
	Logistic	-*(0.0368,0.212)	-*,n.s., -*(0.0369,0.213)	-*, +*, +*(0.048,0.212)	n.s., +*, -*(0.111,0.124)
preferential slope	Linear	+*(0.00179,0.289)	+*, +*, n.s.(0.00374,0.288)	-*, -*, +*(0.162,0.191)	+*, +*, -*(0.0173,0.284)
	Exponential1	+*(9.98e-05,0.992)	+*, +*, +*(0.00049,0.992)	-*, -*, +*(0.983,0.985)	+*, +*, -*(0.000217,0.992)
	Exponential2	+*(0.00568,0.701)	+*, +*, +*(0.012,0.7)	-*, -*, +*(0.534,0.556)	+*, +*, -*(0.00848,0.7)
	Hump centered	+*(0.000462,0.269)	-*, -*, +*(0.0299,0.299)	-*, -*, +*(0.114,0.19)	+*, +*, -*(0.0764,0.276)
	Hump non-centered	+*(0.00313,0.3)	+*, +*, n.s.(0.0059,0.298)	-*, -*, +*(0.174,0.197)	+*, +*, -*(0.0143,0.298)
	Logistic	-*(0.000388,0.177)	-*, +*, +*(0.00316,0.175)	-*, -*, +*(0.0765,0.121)	+*, +*, -*(0.022,0.164)
preferential slope +extremes	Linear	+*(0.00143,0.291)	+*, +*, -*(0.00433,0.289)	-*, -*, +*(0.161,0.194)	+*, +*, -*(0.0182,0.286)
	Exponential1	n.s.(1.16e-08,0.982)	-*, -*, +*(0.000289,0.982)	-*, -*, +*(0.965,0.965)	+*, +*, -*(0.000109,0.982)
	Exponential2	+*(0.000812,0.598)	-*, -*, +*(0.00298,0.6)	-*, -*, +*(0.424,0.439)	+*, +*, -*(0.0124,0.598)
	Hump centered	-*(4.96e-05,0.269)	-*, -*, +*(0.0321,0.3)	-*, -*, +*(0.0956,0.202)	+*, +*, -*(0.0925,0.265)
	Hump non-centered	+*(0.00176,0.288)	+*, +*, n.s.(0.00365,0.287)	-*, -*, (0.163,0.19)	+*, +*, -*(0.0182,0.285)
	Logistic	-*(0.00139,0.194)	-*, +*, +*(0.00577,0.191)	-*, -*, +*(0.0835,0.138)	+*, +*, -*(0.0227,0.176)
random	Linear	+*(0.000743,0.295)	+*, n.s.,n.s.(0.000743,0.295)	-*, -*, +*(0.165,0.194)	+*, +*, -*(0.0201,0.291)
	Exponential1	-*(4.44e-05,0.984)	-*, n.s.,n.s.(5.26e-05,0.981)	-*, -*, -*(0.962,0.962)	-*,n.s., +*(5.13e-05,0.981)
	Exponential2	-*(0.000535,0.615)	-*, n.s.,n.s.(0.000535,0.615)	-*, -*, +*(0.436,0.449)	+*, +*, -*(0.00689,0.614)
	Hump centered	-*(0.0552,0.396)	-*,n.s., n.s.(0.0552,0.396)	-*, -*, -*(0.168,0.332)	-*, +*, +*(0.126,0.337)
	Hump non-centered	+*(0.000379,0.277)	+*,n.s., n.s.(0.000379,0.277)	-*, -*, +*(0.152,0.18)	+*, +*, -*(0.02,0.272)
	Logistic	-*(0.0285,0.177)	-*,n.s., n.s.(0.0285,0.177)	-*, -*, +*(0.0313,0.177)	+*, +*, -*(0.101,0.105)

## Sheet: TabS5_RMSE_20%
	For negative RMSE (-RMSE) and 20% random variation
	Depicted are the direction of single and interactive effects (first two are the individual effects of predictor A and B and third one ist the interactive effect) as well as marginal and conditional R2 values for the respective models (in parentheses)
		Effect:
		Model 1	Model 2	Model 3	Model 4
Sampling strategy	Response shape	~Replicates	~Replicates*Predictor extremes (excluded/included)	~Replicates*Pattern (kown/unknown)	~Replicates*Total sample size
systematic	Linear	+*(0.00205,0.459)	+*, n.s.,n.s.(0.00205,0.459)	-*, -*, +*(0.035,0.447)	+*, +*, -*(0.305,0.366)
	Exponential1	-*(0.0694,0.839)	-*,n.s., n.s.(0.0694,0.839)	-*, -*, -*(0.618,0.793)	-*, +*, +*(0.0946,0.799)
	Exponential2	-*(0.106,0.699)	-*,n.s., n.s.(0.105,0.7)	-*, +*, +*(0.244,0.675)	-*, +*, n.s.(0.251,0.529)
	Hump centered	+*(0.00266,0.498)	+*,n.s., n.s.(0.00266,0.498)	+*, -*, +*(0.0166,0.494)	+*, +*, -*(0.371,0.397)
	Hump non-centered	-*(0.00379,0.549)	-*,n.s., n.s.(0.00379,0.549)	-*, +*, +*(0.161,0.545)	+*, +*, -*(0.222,0.444)
	Logistic	-*(0.281,0.606)	-*,n.s., n.s.(0.281,0.606)	-*, -*, +*(0.312,0.632)	-*, +*, +*(0.369,0.379)
log systematic	Linear	-*(5.26e-05,0.0994)	n.s., n.s.,n.s.(5.26e-05,0.0994)	-*, -*, +*(0.00866,0.0947)	+*, +*, -*(0.00775,0.0223)
	Exponential1	-*(1e-04,0.108)	-*,n.s., n.s.(1e-04,0.108)	-*, -*, +*(0.00986,0.102)	+*, +*, -*(0.00806,0.0252)
	Exponential2	-*(0.000104,0.107)	-*,n.s., n.s.(0.000104,0.107)	-*, -*, +*(0.00932,0.102)	+*, +*, -*(0.00809,0.024)
	Hump centered	-*(0.000125,0.123)	-*, n.s.,n.s.(0.000125,0.123)	-*, -*, +*(0.0104,0.117)	+*, +*, -*(0.00912,0.027)
	Hump non-centered	-*(8.91e-05,0.106)	-*, n.s.,n.s.(8.91e-05,0.106)	-*, -*, +*(0.00903,0.101)	+*, +*, -*(0.00791,0.0233)
	Logistic	-*(0.000123,0.108)	-*, n.s.,n.s.(0.000123,0.108)	-*, -*, +*(0.00963,0.102)	+*, +*, -*(0.00801,0.0245)
preferential extremes	Linear	n.s.(1.95e-07,0.000142)	n.s.,n.s., n.s.(1.62e-05,0.000148)	n.s., n.s.,n.s.(1.63e-05,0.000148)	n.s.,n.s., n.s.(1.22e-05,3.12e-05)
	Exponential1	n.s.(6.86e-07,8.74e-05)	n.s.,n.s.,n.s.(3.17e-05,7.5e-05)	n.s.,n.s.,n.s.(3.17e-05,7.5e-05)	-*,n.s.,+*(4.85e-05,0.000135)
	Exponential2	n.s.(2.23e-06,0.00125)	n.s., +*, n.s.(0.000154,0.00115)	n.s., -*,n.s.(0.000163,0.00114)	n.s., +*, n.s.(0.00012,0.000631)
	Hump centered	n.s.(3.89e-06,0.000306)	n.s., +*, n.s.(7.41e-05,0.000253)	n.s., -*,n.s.(6.51e-05,0.000262)	n.s.,n.s.,n.s.(5.15e-05,0.000279)
	Hump non-centered	n.s.(4.95e-07,0.000569)	n.s., +*, n.s.(7.16e-05,0.00053)	n.s., -*,n.s.(7.42e-05,0.000528)	n.s., +*, n.s.(4.87e-05,0.000273)
	Logistic	n.s.(1.29e-06,0.000812)	n.s., +*, n.s.(0.000103,0.000754)	n.s., -*,n.s.(0.000109,0.000751)	n.s., +*, n.s.(8.54e-05,0.000411)
preferential slope	Linear	n.s.(4.69e-07,0.000312)	n.s.,n.s., n.s.(3.45e-05,0.000303)	n.s., -*,n.s.(8.48e-05,0.00027)	n.s., +*, n.s.(6.34e-05,0.000233)
	Exponential1	n.s.(2.3e-07,0.00391)	+*, +*, -*(0.000437,0.00369)	-*, -*, +*(0.000437,0.00369)	+*, +*, -*(0.000441,0.00175)
	Exponential2	n.s.(1.84e-07,0.00138)	n.s., +*, n.s.(0.000138,0.00131)	n.s., -*,n.s.(0.000139,0.00131)	n.s., +*, n.s.(0.00011,0.000526)
	Hump centered	n.s.(2.92e-07,0.000482)	n.s., +*, n.s.(6e-05,0.000451)	n.s., -*,n.s.(6.91e-05,0.000454)	n.s., +*, n.s.(6.46e-05,0.000252)
	Hump non-centered	n.s.(3.89e-07,0.000672)	n.s., +*, n.s.(9.81e-05,0.000616)	n.s., -*,n.s.(0.000114,0.000606)	n.s., +*, n.s.(7.82e-05,0.000412)
	Logistic	n.s.(1.08e-06,0.00434)	n.s., +*, -*(0.000496,0.00404)	-*, -*, +*(0.000497,0.00404)	+*, +*, -*(0.000389,0.00199)
preferential slope +extremes	Linear	n.s.(1.95e-06,0.000761)	n.s., +*, n.s.(0.000109,0.000684)	n.s., -*,n.s.(0.000133,0.000665)	n.s., +*, n.s.(8.87e-05,0.000499)
	Exponential1	n.s.(2.29e-05,0.000471)	n.s., +*,n.s.(9.99e-05,0.000415)	n.s., +*,n.s.(9.99e-05,0.000415)	-*,n.s.,n.s.(9.2e-05,0.000359)
	Exponential2	n.s.(3e-06,0.00149)	n.s., +*, n.s.(7.2e-05,0.00145)	n.s., -*,n.s.(0.00014,0.0014)	n.s., +*, n.s.(9.53e-05,0.000427)
	Hump centered	n.s.(5.02e-06,0.0015)	n.s., +*, n.s.(0.00015,0.0014)	n.s., -*,n.s.(0.000177,0.00141)	n.s., +*, n.s.(0.000175,0.000681)
	Hump non-centered	n.s.(1.1e-07,0.000264)	n.s.,n.s., n.s.(1.84e-05,0.00027)	n.s., n.s.,n.s.(1.86e-05,0.00027)	n.s.,n.s., n.s.(1.6e-05,3.98e-05)
	Logistic	n.s.(7.71e-08,0.00056)	n.s., +*, n.s.(4.8e-05,0.000549)	n.s., -*,n.s.(4.81e-05,0.000549)	n.s.,n.s., n.s.(4.15e-05,0.000159)
random	Linear	n.s.(4.15e-08,0.000635)	n.s., n.s.,n.s.(4.14e-08,0.000635)	n.s., -*,n.s.(3.98e-05,0.000628)	n.s.,n.s., n.s.(3.3e-05,8.06e-05)
	Exponential1	-*(0.000237,0.000334)	-*, n.s., n.s.(0.000237,0.000334)	-*, n.s., +*(0.000519,0.000525)	-*,n.s.,n.s.(0.00028,0.000372)
	Exponential2	n.s.(6.14e-08,0.00064)	n.s., n.s.,n.s.(6.14e-08,0.00064)	n.s., -*,n.s.(4.03e-05,0.000631)	n.s.,n.s., n.s.(3.32e-05,8.18e-05)
	Hump centered	n.s.(1.48e-07,0.000635)	n.s.,n.s., n.s.(1.48e-07,0.000635)	n.s., -*,n.s.(4.03e-05,0.000628)	n.s.,n.s., n.s.(3.56e-05,8.32e-05)
	Hump non-centered	n.s.(4.59e-08,0.000629)	n.s., n.s.,n.s.(4.59e-08,0.000629)	n.s., -*,n.s.(3.95e-05,0.000621)	n.s.,n.s., n.s.(3.28e-05,7.99e-05)
	Logistic	n.s.(1.33e-07,0.00064)	n.s.,n.s., n.s.(1.33e-07,0.00064)	n.s., -*,n.s.(4.11e-05,0.000631)	n.s.,n.s., n.s.(3.34e-05,8.35e-05)

## Sheet: TabS6_RMSE_100%
	For negative RMSE (-RMSE) and 100% random variation
	Depicted are the direction of single and interactive effects (first two are the individual effects of predictor A and B and third one ist the interactive effect) as well as marginal and conditional R2 values for the respective models (in parentheses)
		Effect:
		Model 1	Model 2	Model 3	Model 4
Sampling strategy	Response shape	~Replicates	~Replicates*Predictor extremes (excluded/included)	~Replicates*Pattern (kown/unknown)	~Replicates*Total sample size
systematic	Linear	+*(0.00205,0.459)	+*,n.s., n.s.(0.00205,0.459)	-*, -*,+*(0.035,0.447)	+*,+*, -*(0.305,0.366)
	Exponential1	-*(0.00453,0.597)	-*,n.s., n.s.(0.00453,0.597)	-*, -*, -*(0.179,0.528)	+*,+*, -*(0.181,0.508)
	Exponential2	-*(7.57e-05,0.491)	-*,n.s., n.s.(7.57e-05,0.491)	-*, -*,+*(0.0464,0.475)	+*,+*, -*(0.288,0.375)
	Hump centered	+*(0.00301,0.515)	+*,n.s.,n.s.(0.003,0.515)	n.s., -*,+*(0.0234,0.509)	+*,+*, -*(0.385,0.422)
	Hump non-centered	+*(0.000749,0.461)	+*, n.s.,n.s.(0.000749,0.46)	-*, -*,+*(0.032,0.451)	+*,+*, -*(0.298,0.354)
	Logistic	-*(0.0124,0.501)	-*, n.s.,n.s.(0.0124,0.501)	-*, -*,+*(0.021,0.508)	+*,+*, -*(0.337,0.339)
log systematic	Linear	-*(5.26e-05,0.0994)	n.s.,n.s.,n.s.(5.26e-05,0.0994)	-*, -*,+*(0.00866,0.0947)	+*,+*, -*(0.00775,0.0223)
	Exponential1	-*(5.9e-05,0.102)	n.s., n.s.,n.s.(5.9e-05,0.102)	-*, -*,+*(0.00889,0.0972)	+*,+*, -*(0.00781,0.0228)
	Exponential2	-*(5.8e-05,0.103)	n.s., n.s.,n.s.(5.8e-05,0.103)	-*, -*,+*(0.00885,0.0979)	+*,+*, -*(0.00785,0.0228)
	Hump centered	-*(9.19e-05,0.104)	-*, n.s.,n.s.(9.19e-05,0.104)	-*, -*,+*(0.00885,0.099)	+*,+*, -*(0.00795,0.0229)
	Hump non-centered	-*(5.66e-05,0.0998)	n.s., n.s.,n.s.(5.66e-05,0.0998)	-*, -*,+*(0.00868,0.0951)	+*,+*, -*(0.00772,0.0223)
	Logistic	-*(5.57e-05,0.101)	n.s.,n.s., n.s.(5.57e-05,0.101)	-*, -*,+*(0.00875,0.0967)	+*,+*, -*(0.00783,0.0225)
preferential extremes	Linear	n.s.(1.95e-07,0.000142)	n.s.,n.s., n.s.(1.62e-05,0.000148)	n.s., n.s.,n.s.(1.63e-05,0.000148)	n.s.,n.s., n.s.(1.22e-05,3.12e-05)
	Exponential1	n.s.(6.86e-07,8.74e-05)	n.s.,n.s.,n.s.(3.17e-05,7.5e-05)	n.s.,n.s.,n.s.(3.17e-05,7.5e-05)	-*,n.s.,+*(4.85e-05,0.000135)
	Exponential2	n.s.(1.82e-06,0.00124)	n.s.,+*, n.s.(0.000153,0.00115)	n.s., -*,n.s.(0.000163,0.00114)	n.s.,+*, n.s.(0.000119,0.000632)
	Hump centered	n.s.(3.58e-06,0.000301)	n.s.,+*, n.s.(7.32e-05,0.000249)	n.s., -*,n.s.(6.33e-05,0.000259)	n.s.,n.s.,n.s.(5.11e-05,0.000274)
	Hump non-centered	n.s.(3.23e-07,0.000563)	n.s.,+*, n.s.(7.13e-05,0.000526)	n.s., -*,n.s.(7.41e-05,0.000524)	n.s.,+*, n.s.(4.92e-05,0.00027)
	Logistic	n.s.(4.48e-07,0.000748)	n.s.,+*, n.s.(9.77e-05,0.000696)	n.s., -*,n.s.(1e-04,0.000697)	n.s.,+*, n.s.(8.13e-05,0.000383)
preferential slope	Linear	n.s.(4.69e-07,0.000312)	n.s.,n.s., n.s.(3.45e-05,0.000303)	n.s., -*,n.s.(8.48e-05,0.00027)	n.s.,+*, n.s.(6.34e-05,0.000233)
	Exponential1	n.s.(1.96e-07,0.00382)	+*,+*, -*(0.000417,0.00362)	-*, -*,+*(0.000417,0.00362)	+*,+*, -*(0.000425,0.00167)
	Exponential2	n.s.(1.79e-07,0.00136)	n.s.,+*, n.s.(0.000137,0.00129)	n.s., -*,n.s.(0.000137,0.00129)	n.s.,+*, n.s.(0.000109,0.000519)
	Hump centered	n.s.(1.84e-07,0.000465)	n.s.,+*, n.s.(5.93e-05,0.000435)	n.s., -*,n.s.(6.66e-05,0.00044)	n.s.,+*, n.s.(6.33e-05,0.000244)
	Hump non-centered	n.s.(3.57e-07,0.000665)	n.s.,+*, n.s.(9.81e-05,0.00061)	n.s., -*,n.s.(0.000113,6e-04)	n.s.,+*, n.s.(7.76e-05,0.000409)
	Logistic	n.s.(1.15e-06,0.0043)	n.s.,+*, -*(0.000489,0.004)	-*, -*,+*(0.000489,0.004)	+*,+*, -*(0.000385,0.00196)
preferential slope +extremes	Linear	n.s.(1.95e-06,0.000761)	n.s.,+*, n.s.(0.000109,0.000684)	n.s., -*,n.s.(0.000133,0.000665)	n.s.,+*, n.s.(8.87e-05,0.000499)
	Exponential1	n.s.(2.29e-05,0.000471)	n.s.,+*,n.s.(9.99e-05,0.000415)	n.s.,+*,n.s.(9.99e-05,0.000415)	-*,n.s.,n.s.(9.2e-05,0.000359)
	Exponential2	n.s.(2.31e-06,0.00145)	n.s.,+*, n.s.(7.45e-05,0.00141)	n.s., -*,n.s.(0.000134,0.00137)	n.s.,+*, n.s.(9.21e-05,0.000419)
	Hump centered	n.s.(4.89e-06,0.00139)	n.s.,+*, n.s.(0.000139,0.0013)	n.s., -*,n.s.(0.000159,0.00131)	n.s.,+*, n.s.(0.000159,0.00062)
	Hump non-centered	n.s.(1.1e-07,0.000264)	n.s.,n.s., n.s.(1.85e-05,0.00027)	n.s., n.s.,n.s.(1.86e-05,0.00027)	n.s.,n.s., n.s.(1.6e-05,3.98e-05)
	Logistic	n.s.(9.14e-08,0.000536)	n.s.,+*, n.s.(4.57e-05,0.000527)	n.s., -*,n.s.(4.57e-05,0.000527)	n.s.,n.s., n.s.(4.07e-05,0.00015)
random	Linear	n.s.(4.15e-08,0.000635)	n.s., n.s.,n.s.(4.14e-08,0.000635)	n.s., -*,n.s.(3.98e-05,0.000628)	n.s.,n.s., n.s.(3.3e-05,8.06e-05)
	Exponential1	-*(0.000237,0.000334)	-*, n.s.,n.s.(0.000237,0.000334)	-*, n.s.,+*(0.000519,0.000525)	-*,n.s.,n.s.(0.00028,0.000372)
	Exponential2	n.s.(4.37e-08,0.000636)	n.s., n.s.,n.s.(4.37e-08,0.000636)	n.s., -*,n.s.(3.98e-05,0.000628)	n.s.,n.s., n.s.(3.31e-05,8.07e-05)
	Hump centered	n.s.(1.15e-07,0.000623)	n.s., n.s.,n.s.(1.15e-07,0.000623)	n.s., -*,n.s.(3.77e-05,0.000617)	n.s.,n.s., n.s.(3.39e-05,7.68e-05)
	Hump non-centered	n.s.(4.01e-08,0.000628)	n.s., n.s.,n.s.(4.01e-08,0.000628)	n.s., -*,n.s.(3.95e-05,0.00062)	n.s.,n.s., n.s.(3.28e-05,7.99e-05)
	Logistic	n.s.(7.48e-08,0.000627)	n.s., n.s.,n.s.(7.48e-08,0.000627)	n.s., -*,n.s.(3.9e-05,0.000621)	n.s.,n.s., n.s.(3.29e-05,7.85e-05)
