# Supplementary material for: How to optimally allocate sampling effort in experimental ecology
Source: Sci Rep. 2026 Feb 13;16:6503. doi: 10.1038/s41598-026-38541-4 (PMC12910100; doi:10.1038/s41598-026-38541-4)
Supplement: Supplementary file 2 — Supplementary Material 2 [file 41598_2026_38541_MOESM2_ESM.xlsx]

## Sheet: Tab_S7_R2_20
Table S7. Effect of replication on prediction accuracy. The effect of replication was tested by using a linear mixed effect model with replicate and a priori knowledge on the underlying reposne ppattern as fixed effects (i.e. model 3 in Table 1). 0 indicates non-significant effects of replication with a level of significance of alpha=0.05. Effects for
		Multiple R2	Multiple R2	RMSE	RMSE	Chalcraft's	Chalcraft's
Strategy	Shape	0.2	1	0.2	1	0.2	1
syst	linear	-0.000580912	-0.00216705	-8.5662e-05	-0.00042831	-0.000590233	0
syst	exponential1	-0.0037708	-0.000909137	-0.00167452	-0.00200647	0	0
syst	exponential2	-0.00172217	-0.00201845	-0.0032653	-0.00228995	-0.00452615	0
syst	hump_centered	-0.000243323	0.000928881	5.37868e-05	0	-0.000318952	0
syst	hump_noncentered	-0.000737187	-0.0020413	-0.00166044	-0.0011909	-0.00315329	0
syst	logistic	-0.0160506	-0.0119111	-0.0112344	-0.00588107	-2.5429e+27	0
log_syst	linear	-0.0024087	-0.00198745	-0.227157	-1.13578	-0.0104054	0
log_syst	exponential1	-0.00587097	-0.00140615	-0.242576	-1.16156	-0.0217518	0
log_syst	exponential2	-0.00589232	-0.00281859	-0.245776	-1.16618	-0.0273277	0
log_syst	hump_centered	-0.00466904	0.000425308	-0.282509	-1.20355	0	0
log_syst	hump_noncentered	-0.00319791	-0.00250791	-0.243742	-1.13966	-0.0174208	0
log_syst	logistic	-0.0144003	0.00128099	-0.250601	-1.1534	-0.0429336	0
pref_extremes	linear	-0.00184811	-0.0023615	0	0	0	0
pref_extremes	exponential1	-0.00359777	-0.000459646	0	0	0	0
pref_extremes	exponential2	-0.00377891	-0.0016263	0	0	0	0
pref_extremes	hump_centered	-0.00677617	-0.00685863	0	0	0	0
pref_extremes	hump_noncentered	-0.00208797	-0.0020017	0	0	-1021.98	0
pref_extremes	logistic	-0.0152226	-0.00998539	0	0	0	0
pref_slope	linear	-0.00175242	-0.0015549	0	0	0	0
pref_slope	exponential1	-0.000480404	-0.000221779	-15748.4	-77092.1	0	0
pref_slope	exponential2	0	-0.000221917	0	0	0	0
pref_slope	hump_centered	-0.00591763	-0.0010999	0	0	0	0
pref_slope	hump_noncentered	-0.00227264	-0.00112274	0	0	0	0
pref_slope	logistic	0	-0.00286424	-56.7129	-282.318	0	0
pref_slope_extremes	linear	-0.00175793	-0.00179876	0	0	0	0
pref_slope_extremes	exponential1	-0.00295492	-0.000459681	0	0	0	0
pref_slope_extremes	exponential2	-0.00382331	-0.00169604	0	0	0	0
pref_slope_extremes	hump_centered	-0.00602522	-0.00249104	0	0	0	0
pref_slope_extremes	hump_noncentered	-0.00222831	-0.00165376	0	0	-2.81871	0
pref_slope_extremes	logistic	-0.000857224	-0.0039663	0	0	0	0
random	linear	-0.00241291	-0.00209656	0	0	0	0
random	exponential1	-0.00384891	-0.00012147	-3362138986968120	-1.68108e+16	0	0
random	exponential2	-0.00527146	-0.00166908	0	0	0	0
random	hump_centered	-0.0107892	-0.0127971	0	0	0	0
random	hump_noncentered	-0.00286951	-0.00203143	0	0	0	0
random	logistic	-0.0117209	-0.00735469	0	0	0	0
