# Supplementary material for: How to optimally allocate sampling effort in experimental ecology
Source: Sci Rep. 2026 Feb 13;16:6503. doi: 10.1038/s41598-026-38541-4 (PMC12910100; doi:10.1038/s41598-026-38541-4)
Supplement: Supplementary file 3 — Supplementary Material 3 [file 41598_2026_38541_MOESM3_ESM.xlsx]

## Sheet: Table S8
Table S8. Mean prediction accuracy for the different sampling strategies and underlying response shapes as well as for fifferent levels of noise and a priori knowledge on the underlying response shape. Prediction accuracy is measred as Chalcraft's prediction success (median of 1000 model runs per senario).
	Noise:	20	20	100	100
	Pattern:	known	unknown	known	unknown
Sampling strategy:	Response shape:
systematic	Linear	0.982826	0.971738	0.640371	0.471479
	Exponential1	0.930326	0.420834	-0.694203	-0.18771
	Exponential2	0.788238	0.899764	0.407992	0.222849
	Hump centered	0.974432	0.9658	0.52521	0.41622
	Hump non-centered	0.90239	0.962822	0.568801	0.462311
	Logistic	0.959795	0.890533	0.479852	0.416925
log systematic	Linear	0.977811	0.954086	0.529995	0.127292
	Exponential1	0.92932	-0.255886	-0.713558	-1.50832
	Exponential2	0.553812	0.569371	0.116604	-0.871095
	Hump centered	0.925813	0.866691	-0.19127	-1.12846
	Hump non-centered	0.738328	0.790912	0.217804	-0.0971778
	Logistic	0.841724	0.233903	-0.428009	-0.22242
preferential extremes	Linear	0.982099	0.966686	0.615825	0.367401
	Exponential1	0.756379	-0.216963	-0.0553048	-0.566253
	Exponential2	0.729549	0.769111	0.156465	-0.121953
	Hump centered	0.956577	0.935123	0.304602	-0.049723
	Hump non-centered	0.884253	0.924307	0.501499	0.304876
	Logistic	0.866808	0.758792	0.270404	0.259845
preferential slope	Linear	0.975069	0.953454	0.527742	0.227404
	Exponential1	0.893915	-0.675941	-1.71483	-1.09836
	Exponential2	0.598087	-0.125991	0.0834967	-0.430822
	Hump centered	0.954465	0.926966	0.306509	-0.325907
	Hump non-centered	0.884458	0.879897	0.473566	0.131923
	Logistic	0.914708	-0.0688142	0.223306	-0.204177
preferential slope +extremes	Linear	0.977769	0.957085	0.552814	0.246707
	Exponential1	0.817575	-0.377832	-0.0559552	-0.660399
	Exponential2	0.700055	0.676568	0.25498	-0.103053
	Hump centered	0.957029	0.930402	0.32189	-0.160482
	Hump non-centered	0.895944	0.911386	0.525605	0.242351
	Logistic	0.926818	-0.162535	0.327994	-0.148387
random	Linear	0.976253	0.95556	0.54202	0.260273
	Exponential1	0.212779	-0.958485	-0.0548008	-0.686932
	Exponential2	0.697817	0.657414	-0.0294342	-0.157274
	Hump centered	0.944514	0.912856	0.237427	-0.221413
	Hump non-centered	0.891188	0.897761	0.473272	0.238567
	Logistic	0.920515	0.723691	0.337676	0.249653

## Sheet: Table S9
Table S9. Mean prediction accuracy for the different sampling strategies and underlying response shapes as well as for fifferent levels of noise and a priori knowledge on the underlying response shape. Prediction accuracy is measred as multiple R2 (median of 1000 model runs per senario).
	Noise:	20	20	100	100
	Pattern:	known	unknown	known	unknown
Sampling strategy:	Response shape:
systematic	Linear	1	1	1	1
	Exponential1	1	0.543933	1	0.14785
	Exponential2	0.843451	0.945351	0.843451	0.614617
	Hump centered	0.995498	0.990806	0.895976	0.761078
	Hump non-centered	0.937383	0.99093	0.937383	0.937383
	Logistic	0.978831	0.928228	0.791385	0.723179
log systematic	Linear	1	1	1	1
	Exponential1	1	0.276866	1	0.14785
	Exponential2	0.843451	0.839485	0.843451	0.614617
	Hump centered	0.994541	0.98576	0.904091	0.231367
	Hump non-centered	0.937383	0.937383	0.937383	0.937383
	Logistic	0.925485	0.723179	0.683105	0.723179
preferential extremes	Linear	1	1	1	1
	Exponential1	1	0.292005	1	0.14785
	Exponential2	0.843451	0.90297	0.843451	0.614617
	Hump centered	0.991713	0.980622	0.84002	0.485172
	Hump non-centered	0.937383	0.968741	0.937383	0.937383
	Logistic	0.918778	0.886781	0.702581	0.723179
preferential slope	Linear	1	1	1	1
	Exponential1	1	0.14785	1	0.14785
	Exponential2	0.843451	0.614617	0.843451	0.614617
	Hump centered	0.992313	0.981871	0.843797	0.379489
	Hump non-centered	0.937383	0.937383	0.937383	0.937383
	Logistic	0.984225	0.723179	0.851508	0.723179
preferential slope +extremes	Linear	1	1	1	1
	Exponential1	1	0.255625	1	0.14785
	Exponential2	0.843451	0.863505	0.843451	0.614617
	Hump centered	0.991297	0.979422	0.822153	0.421238
	Hump non-centered	0.937383	0.937383	0.937383	0.937383
	Logistic	0.983576	0.691065	0.848415	0.723179
random	Linear	1	1	1	1
	Exponential1	1	0.14785	1	0.14785
	Exponential2	0.843451	0.860881	0.843451	0.614617
	Hump centered	0.987884	0.969601	0.790572	0.294041
	Hump non-centered	0.937383	0.937383	0.937383	0.937383
	Logistic	0.963453	0.838961	0.724765	0.723179

## Sheet: Table S10
Table S10. Mean prediction accuracy for the different sampling strategies and underlying response shapes as well as for fifferent levels of noise and a priori knowledge on the underlying response shape. Prediction accuracy is measred as RMSE (negative values; median of 1000 model runs per senario).
	Noise:	20	20	100	100
	Pattern:	known	unknown	known	unknown
Sampling strategy:	Response shape:
systematic	Linear	-0.0382035	-0.0488901	-0.191018	-0.24445
	Exponential1	-0.0299721	-0.15096	-0.149861	-0.333314
	Exponential2	-0.118647	-0.0787776	-0.221808	-0.285571
	Hump centered	-0.0482846	-0.0556621	-0.241423	-0.308901
	Hump non-centered	-0.090248	-0.0583542	-0.207807	-0.254621
	Logistic	-0.0873106	-0.139687	-0.33914	-0.314247
log systematic	Linear	-0.0432546	-0.0622687	-0.216273	-0.311343
	Exponential1	-0.0302319	-0.34356	-0.151159	-0.529956
	Exponential2	-0.184897	-0.198262	-0.268874	-0.436654
	Hump centered	-0.0826726	-0.111437	-0.413363	-0.588307
	Hump non-centered	-0.135711	-0.131523	-0.251799	-0.342294
	Logistic	-0.157609	-0.317865	-0.418533	-0.425697
preferential extremes	Linear	-0.0388775	-0.0531012	-0.194387	-0.265506
	Exponential1	-0.0573325	-0.148972	-0.286662	-0.360271
	Exponential2	-0.129268	-0.130208	-0.251821	-0.342778
	Hump centered	-0.0630372	-0.0774412	-0.315186	-0.414248
	Hump non-centered	-0.0988945	-0.0831174	-0.223117	-0.289932
	Logistic	-0.157016	-0.190157	-0.401172	-0.371789
preferential slope	Linear	-0.0459297	-0.0630974	-0.229649	-0.315487
	Exponential1	-0.0369358	-4.81404	-0.184679	-2.7117
	Exponential2	-0.20263	-0.506331	-0.330204	-0.674304
	Hump centered	-0.0643977	-0.0821484	-0.321989	-0.423537
	Hump non-centered	-0.110351	-0.109883	-0.268829	-0.36796
	Logistic	-0.122618	-1.44872	-0.466518	-1.21138
preferential slope +extremes	Linear	-0.0433753	-0.0603656	-0.216877	-0.301828
	Exponential1	-0.0484357	-0.266509	-0.242178	-0.430629
	Exponential2	-0.152946	-0.165226	-0.263325	-0.375746
	Hump centered	-0.0627536	-0.0800701	-0.313768	-0.420952
	Hump non-centered	-0.10137	-0.0920555	-0.240002	-0.320638
	Logistic	-0.114221	-1.37519	-0.449483	-1.15993
random	Linear	-0.0448991	-0.0614378	-0.224495	-0.307189
	Exponential1	-0.136442	-0.128104	-0.682209	-0.334265
	Exponential2	-0.117565	-0.142027	-0.252386	-0.350142
	Hump centered	-0.0714655	-0.0905408	-0.357327	-0.441784
	Hump non-centered	-0.0969171	-0.0968111	-0.241308	-0.321335
	Logistic	-0.12117	-0.235602	-0.41497	-0.422548
